# Supplementary material
Source: publisher site journal article supplement (https://www.dovepress.com/get_supplementary_file.php?f=240013.docx)
Supplement: Supplementary file 1 [file get_supplementary_file.php]

**Supplementary table: antibiotic susceptibility pattern, MIC, *gyrA* mutation and PMQR genes in FQ-resistant UPEC isolates**

|  | Antibiotic susceptibility pattern | | | | | | | | | | | | | MIC  (CIP) | QRDRs (*gyrA*) | PMQR genes | | | | |
| --- | --- | --- | --- | --- | --- | --- | --- | --- | --- | --- | --- | --- | --- | --- | --- | --- | --- | --- | --- | --- |
| CIP | LVZ | IMP | MEM | AK | GEN | AMC | ATM | FOX | CAZ | FEP | SXT | F | *qnrA* | *qnrB* | *qnrS* | *aac* | *qepA* |
| 1 | R | R | S | S | R | R | R | R | R | R | R | R | R | 32 | Both | - | - | *qnrS* | *aac* | - |
| 2 | R | R | S | S | R | R | R | R | R | R | R | R | S | >32 | Both | - | *qnrB* | *-* | *aac* | - |
| 3 | R | R | S | S | S | S | R | R | R | R | R | R | R | >32 | Both | - | - | - | - | - |
| 4 | R | R | I | S | S | I | S | S | R | R | R | R | S | 32 | Asp-87 | - | - | *qnrS* | *aac* | - |
| 5 | R | R | S | S | R | R | R | R | R | R | R | R | R | >32 | Both | - | *qnrB* | - | *aac* | - |
| 6 | R | R | S | S | R | R | R | R | R | R | R | R | S | 16 | --- | - | *-* | *qnrS* | *-* | *qepA* |
| 7 | R | R | S | S | S | R | R | S | R | R | R | R | S | >32 | Both | - | - | - | - | - |
| 8 | R | R | S | S | R | R | R | R | R | R | R | R | S | >32 | Ser-83 | - | - | *qnrS* | *aac* | *-* |
| 9 | R | R | S | S | R | R | S | R | R | R | R | R | R | >32 | Ser-83 | *-* | - | - | *aac* | - |
| 10 | R | R | S | S | S | S | R | R | R | R | R | R | R | >32 | --- | - | *qnrB* | *-* | *aac* | *-* |
| 11 | R | R | S | S | R | R | R | R | R | R | R | R | S | >32 | Asp-87 | *-* | - | - | *aac* | - |
| 12 | R | R | S | S | S | R | R | I | R | R | R | R | R | >32 | Both | - | - | - | - | - |
| 13 | R | R | I | S | S | S | S | R | R | R | R | R | S | 32 | Ser-83 | - | *qnrB* | *-* | *aac* | - |
| 14 | R | R | S | S | R | R | R | R | R | R | R | R | I | 32 | --- | - | - | - | *aac* | - |
| 15 | R | R | S | S | S | R | R | I | R | R | R | R | R | >32 | --- | - | - | - | *aac* | - |
| 16 | R | R | S | S | S | R | R | R | R | R | R | S | I | >32 | Both | - | *qnrB* | - | *aac* | *qepA* |
| 17 | R | R | I | S | S | R | R | R | R | R | R | R | R | >32 | Asp-87 | - | - | *qnrS* | *aac* | - |
| 18 | R | R | S | S | R | I | R | R | R | R | R | R | S | >32 | Asp-87 | *-* | - | - | *aac* | - |
| 19 | R | R | S | S | R | R | R | R | R | R | R | R | S | 16 | --- | - | - | - | - | - |
| 20 | R | R | S | S | I | S | R | R | R | R | R | R | S | 4 | --- | - | *qnrB* | - | - | - |
| 21 | R | R | S | S | S | R | R | R | R | R | R | R | S | >32 | Both | - | *qnrB* | *qnrS* | *aac* | - |
| 22 | R | R | I | S | R | R | R | S | R | R | R | R | R | >32 | Both | - | - | *qnrS* | *aac* | *-* |
| 23 | R | R | S | S | S | I | R | R | R | R | R | R | R | >32 | Ser-83 | - | - | *qnrS* | *aac* | - |
| 24 | R | R | S | S | R | R | R | R | R | R | R | S | S | 32 | Asp-87 | *-* | - | *qnrS* | *aac* | - |
| 25 | R | R | S | S | I | R | R | R | R | R | R | R | S | 32 | Both | - | - | - | - | - |
| 26 | R | R | S | S | R | R | R | R | R | R | R | R | R | >32 | Ser-83 | - | *qnrB* | - | *aac* | - |
| 27 | R | R | S | S | S | S | R | R | R | R | R | R | R | 16 | --- | - | - | *qnrS* | *aac* | - |
| 28 | R | R | I | S | S | S | R | S | R | R | R | R | S | >32 | Both | - | - | - | - | - |
| 29 | R | R | S | S | R | R | R | R | R | R | R | R | I | 32 | Both | - | - | - | - | - |
| 30 | R | R | S | S | S | R | R | S | R | R | R | R | S | >32 | Asp-87 | - | *qnrB* | - | *aac* | - |
| 31 | R | R | S | S | S | S | S | R | R | R | R | R | R | 32 | --- | - | - | *qnrS* | *aac* | - |
| 32 | R | R | S | S | R | I | S | I | R | R | R | R | R | >32 | Ser-83 | - | - | - | - | - |
| 33 | R | R | S | S | S | S | R | R | R | R | R | R | R | >32 | Ser-83 | - | *qnrB* | *qnrS* | - | *-* |
| 34 | R | R | S | S | S | R | R | R | R | R | R | R | S | 32 | Both | - | - | *qnrS* | - | *qepA* |
| 35 | R | R | S | S | R | R | R | R | R | R | R | R | S | 32 | Both | *-* | *qnrB* | - | *aac* | - |
| 36 | R | R | I | S | R | R | R | S | R | R | R | R | R | 16 | Both | - | - | - | - | - |
| 37 | R | R | I | S | S | I | R | R | R | R | R | S | R | 32 | --- | *-* | - | - | *aac* | *qepA* |
| 38 | R | R | S | S | I | R | R | R | R | R | R | R | S | >32 | Both | - | - | - | *aac* | - |
| 39 | R | R | S | S | R | R | R | R | R | R | R | R | R | 32 | Ser-83 | *-* | *qnrB* | *qnrS* | - | - |
| 40 | R | R | S | S | S | R | R | R | R | R | R | R | R | >32 | Ser-83 | - | - | - | - | - |
| 41 | R | R | S | S | R | R | R | R | R | R | R | R | S | >32 | Asp-87 | *-* | - | *qnrS* | *aac* | - |
| 42 | R | R | R | S | S | R | S | R | R | R | R | R | S | 8 | --- | - | *qnrB* | - | - | *qepA* |
| 43 | R | R | S | S | R | R | R | S | R | R | R | R | R | >32 | Both | - | - | - | *aac* | *qepA* |
| 44 | R | R | S | S | S | R | R | R | R | R | R | R | S | >32 | Both | - | - | - | - | - |
| 45 | R | R | I | S | R | R | R | R | R | R | R | S | R | >32 | Both | - | *-* | *qnrS* | *aac* | - |
| 46 | R | R | S | S | S | R | S | I | R | R | R | R | R | 32 | Asp-87 | *-* | *qnrB* | *qnrS* | - | - |
| 47 | R | R | I | S | S | R | R | R | R | R | R | R | S | >32 | Both | - | - | - | - | - |
| 48 | R | R | S | S | S | R | R | R | R | R | R | R | S | >32 | Ser-83 | *-* | - | - | *aac* | *qepA* |
| 49 | R | R | S | S | R | R | S | R | R | R | R | R | S | >32 | Ser-83 | - | - | *qnrS* | *aac* | - |
| 50 | R | R | R | S | S | S | R | R | R | R | R | R | S | >32 | Ser-83 | - | *qnrB* | *qnrS* | - | - |
| 51 | R | R | S | S | S | R | R | R | R | R | R | R | S | 16 | --- | - | - | - | *aac* | - |
| 52 | R | R | S | S | S | S | R | R | R | R | R | R | R | 32 | Ser-83 | - | - | - | *aac* | - |
| 53 | R | R | I | S | R | R | R | R | R | R | R | R | R | >32 | Ser-83 | - | *qnrB* | - | *aac* | - |
| 54 | R | R | S | S | S | S | R | S | R | R | R | R | S | 32 | Ser-83 | *-* | - | *qnrS* | - | - |
| 55 | R | R | S | S | S | R | R | R | R | R | R | S | S | >32 | Both | - | *qnrB* | - | *aac* | - |
| 56 | R | R | S | S | R | R | R | R | R | R | R | R | S | >32 | Ser-83 | - | *qnrB* | - | *aac* | - |
| 57 | R | R | S | S | R | S | R | R | R | R | R | R | S | 32 | Asp-87 | - | - | *qnrS* | *aac* | - |
| 58 | R | R | S | S | S | R | R | R | R | R | R | R | S | 32 | Asp-87 | *-* | - | - | *aac* | - |
| 59 | R | R | I | S | S | R | R | S | R | R | R | R | R | >32 | Ser-83 | - | - | *qnrS* | *aac* | - |
| 60 | R | R | S | S | R | R | S | R | R | R | R | R | R | 32 | --- | - | - | - | *aac* | - |
| 61 | R | R | S | S | S | R | R | R | R | R | R | R | S | >32 | Both | - | - | - | - | - |
| 62 | R | R | S | S | I | R | R | R | R | R | R | R | R | >32 | Both | - | - | *qnrS* | *aac* | - |
| 63 | R | R | S | S | R | R | R | R | R | R | R | R | R | >32 | Asp-87 | - | - | *qnrS* | - | - |
| 64 | R | R | S | S | R | R | R | I | R | R | R | R | S | 32 | --- | *-* | - | *qnrS* | - | - |
| 65 | R | R | S | S | R | I | R | R | R | R | R | R | S | 32 | --- | - | - | *qnrS* | *aac* | - |
| 66 | R | R | S | S | I | R | R | R | R | R | R | R | R | >32 | Both | - | - | - | - | - |
| 67 | R | R | S | S | I | R | R | R | R | R | R | R | R | >32 | Ser-83 | - | - | - | *aac* | - |
| 68 | R | R | S | S | S | R | R | R | R | R | R | R | R | >32 | Both | *-* | - | *qnrS* | - | - |
| 69 | R | R | I | S | S | I | S | R | R | R | R | R | I | 32 | Both | - | - | *qnrS* | - | - |
| 70 | R | R | S | S | R | R | R | R | R | R | R | R | R | >32 | Ser-83 | - | - | - | *aac* | - |
| 71 | R | R | S | S | R | R | R | R | R | R | R | S | R | 32 | --- | - | - | - | *aac* | - |
| 72 | R | R | S | S | S | R | R | S | R | R | R | R | S | >32 | Ser-83 | *-* | - | *qnrS* | *aac* | - |
| 73 | R | R | S | S | S | R | S | R | R | R | R | R | S | >32 | Both | - | - | - | *aac* | - |
| 74 | R | R | S | S | S | R | R | R | R | R | R | R | S | 16 | Ser-83 | - | - | - | - | - |
| 75 | R | R | S | S | R | R | R | R | R | R | R | R | S | >32 | Both | - | *qnrB* | *qnrS* | - | - |
| 76 | R | R | S | S | S | R | R | S | R | R | R | R | R | >32 | Both | - | - | *qnrS* | *aac* | - |
| 77 | R | R | S | S | S | R | R | R | R | R | R | R | S | 16 | --- | - | - | - | *aac* | - |
| 78 | R | R | S | S | R | R | S | R | R | R | R | R | S | 4 | --- | - | *qnrB* | - | *aac* | - |
| 79 | R | R | I | S | S | R | R | R | R | R | R | R | S | >32 | Ser-83 | *-* | - | *qnrS* | - | - |
| 80 | R | R | S | S | R | R | R | R | R | R | R | R | R | >32 | Asp-87 | - | - | *qnrS* | *aac* | - |
| 81 | R | R | S | S | R | R | R | I | R | R | R | R | R | >32 | Ser-83 | - | - | - | *aac* | - |
| 82 | R | R | S | S | S | R | R | R | R | R | R | R | S | >32 | --- | - | - | *qnrS* | - | - |
| 83 | R | R | S | S | S | R | S | R | R | R | R | R | S | 32 | Asp-87 | - | - | - | - | - |
| 84 | R | R | S | S | R | R | R | R | R | R | R | R | R | 32 | Both | - | - | *qnrS* | - | *qepA* |
| 85 | R | R | S | S | R | R | R | R | R | R | R | R | S | 16 | --- | - | - | - | *aac* | *qepA* |
| 86 | R | R | S | S | S | R | R | R | R | R | R | R | S | >32 | Ser-83 | *-* | - | *qnrS* | - | - |
| 87 | R | R | S | S | S | R | R | R | R | R | R | R | R | 8 | Asp-87 | - | - | - | - | - |
| 88 | R | R | S | S | I | I | R | R | R | R | R | R | S | >32 | Both | - | - | *qnrS* | *aac* | - |
| 89 | R | R | I | S | R | S | S | S | R | R | R | R | R | 32 | --- | - | - | *qnrS* | *aac* | - |
| 90 | R | R | I | S | R | S | S | R | R | R | R | S | I | 32 | --- | *-* | - | *qnrS* | *aac* | - |
